# Supplementary material
Source: Research Square preprint supplement (doi:10.21203/rs.3.rs-9643229/v1)
Supplement: Supplementary file 1 [file b182c5cce3c281c2ee39586e.xlsx]

## Sheet: Sheet1
Oligos used in the study
ABE3030IVT_FwdP_oSS477	GCTAATACGACTCACTATAAGGCCACCATGgattacaaagacgatgacga
ABE3030IVT_RevP_oSS478	TTTTTTTTTTTTTTTTGGTTTATTttaCTTTCTTTTTCTTAGCTTGACCAGCTTTC
TP53-R273H-FwdP_oSS367	CTTCTTTGGCTGGGGAGAGG
TP53-R273H-RevP_oSS368	CACCTCTCATCACATCCCCG
VEGFA_ABE_FwdP_oSS462	GTGCAGACGGCAGTCACTAGG
VEGFA_ABE_RevP_oSS463	TATTGGAATCCTGGAGTGACCC
Protospacers used in the study
TP53-R273H protospacer	GTGCATGTTTGTGCCTGTCC
Control (VEGFA) protospacer	GGTGAGTGAGTGTGTGCGTG
