# Supplementary material
Source: Research Square preprint supplement (doi:10.21203/rs.3.rs-9643229/v1)
Supplement: Supplementary file 2 [file e3ef848e9e95338ed7989e62.xlsx]

## Sheet: Off-target sites of sgR273H
#Bulge type	crRNA	DNA	Chromosome	Position	Direction	Mismatches	Bulge Size
X	GTGCATGTTTGTGCCTGTCCNGG	GgGCATGTTTGgGCCTGTCaGGG	chr8	79119996	-	3	0	OT1
RNA	GTGCATGTTTGTGCCTGTCCNGG	GTGCcTGTTTGTG-gTGTCCTGG	chr15	47520857	+	2	1	OT2
X	GTGCATGTTTGTGCCTGTCCNGG	GTGggTGTTTGTGCaTGTCCGGG	chr1	1479920	-	3	0	OT3
X	GTGCATGTTTGTGCCTGTCCNGG	cTGgATGcTTGTGCCTGTCCTGG	chr22	24540237	-	3	0	OT4
X	GTGCATGTTTGTGCCTGTCCNGG	GTGCtTGaTTGTGCCTGgCCAGG	chr2	238546268	-	3	0	OT5
DNA	GTGCATG-TTTGTGCCTGTCCNGG	tTGCATGTTTTGTGCCTGgCCTGG	chr2	218788192	+	2	1	OT6
DNA	GTGCATGTTTGTGCCTGT-CCNGG	GTGCATGTgTGTGCCTGTACCTGG	chr12	113459544	+	1	1	OT7
X	GTGCATGTTTGTGCCTGTCCNGG	GTGaATGTgTGTGtCTGTCCCGG	chr16	71637	-	3	0	OT8
X	GTGCATGTTTGTGCCTGTCCNGG	GTGCATGTcTGTGCaTGTgCTGG	chrX	18895625	-	3	0	OT9
RNA	GTGCATGTTTGTGCCTGTCCNGG	aT-CATGTTTGTaCCTGTCCCGG	chrX	137277455	+	2	1	OT10
X	GTGCATGTTTGTGCCTGTCCNGG	GTGCATGTTTGTGtgTGTCCAGG	chr10	62620551	-	2	0	OT11
X	GTGCATGTTTGTGCCTGTCCNGG	GTtaATGTTTcTGCCTGTCCAGG	chr19	54549824	-	3	0	OT12
RNA	GTGCATGTTTGTGCCTGTCCNGG	cTG-ATGTTTtTGCCTGTCCAGG	chr18	39337895	+	2	1	OT13
X	GTGCATGTTTGTGCCTGTCCNGG	GTcCATaTTTGTGCaTGTCCTGG	chr3	48887337	-	3	0	OT14
X	GTTCAGGAATGTGCCTGTCCNGG	GTTCAGGAATGTGCCTGTCCAGG	chr2	65073712	+	4	0	OT15
